# Supplementary material
Source: Research Square preprint supplement (doi:10.21203/rs.3.rs-9327009/v1)

Selected for Figure 2

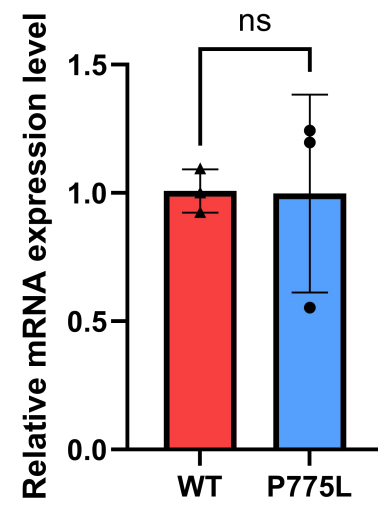

COG5-flag

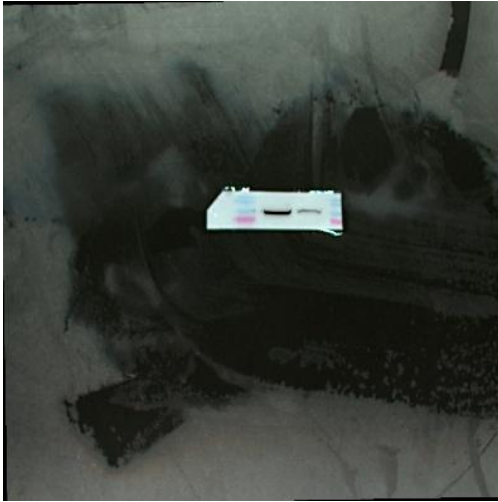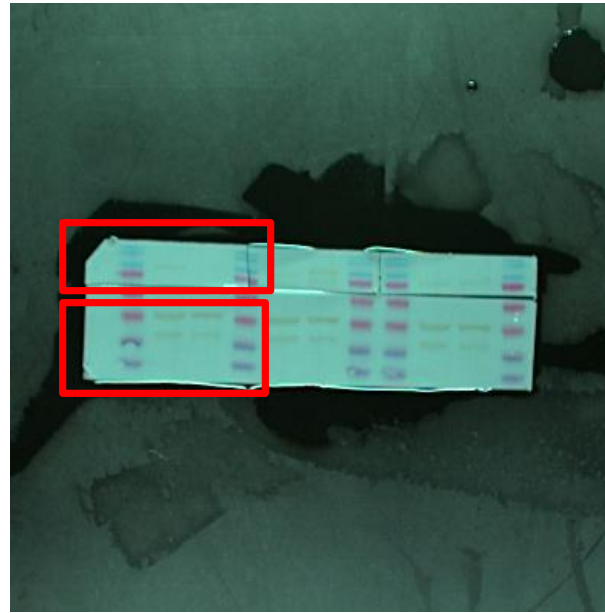

Selected for Figure 3A

Cropped area used in  
Figure 3A

$\beta$ -actin

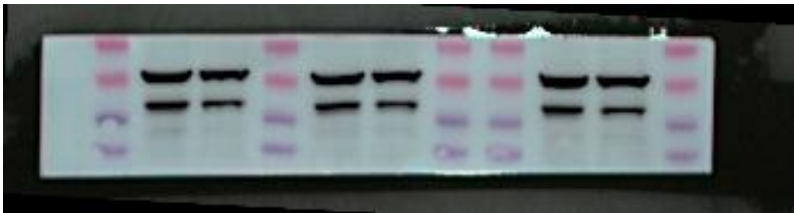

The membrane was cut prior  
to antibody incubation

- Supplementary\_Figure\_3\_Original\_Blots\_Replicate\_1(n=3)

COG5-flag

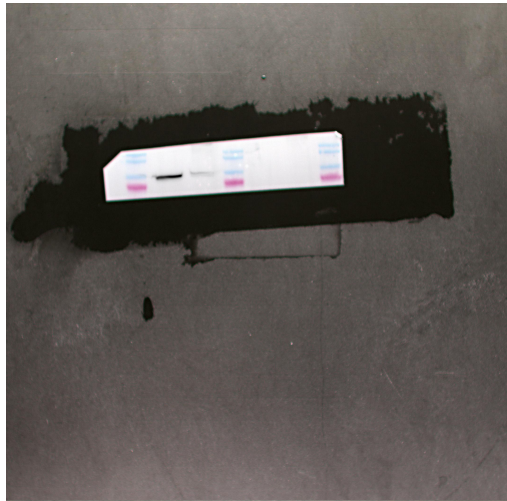

$\beta$ -actin

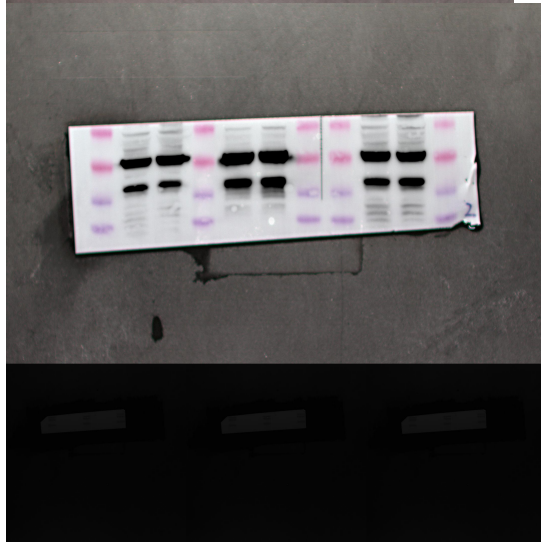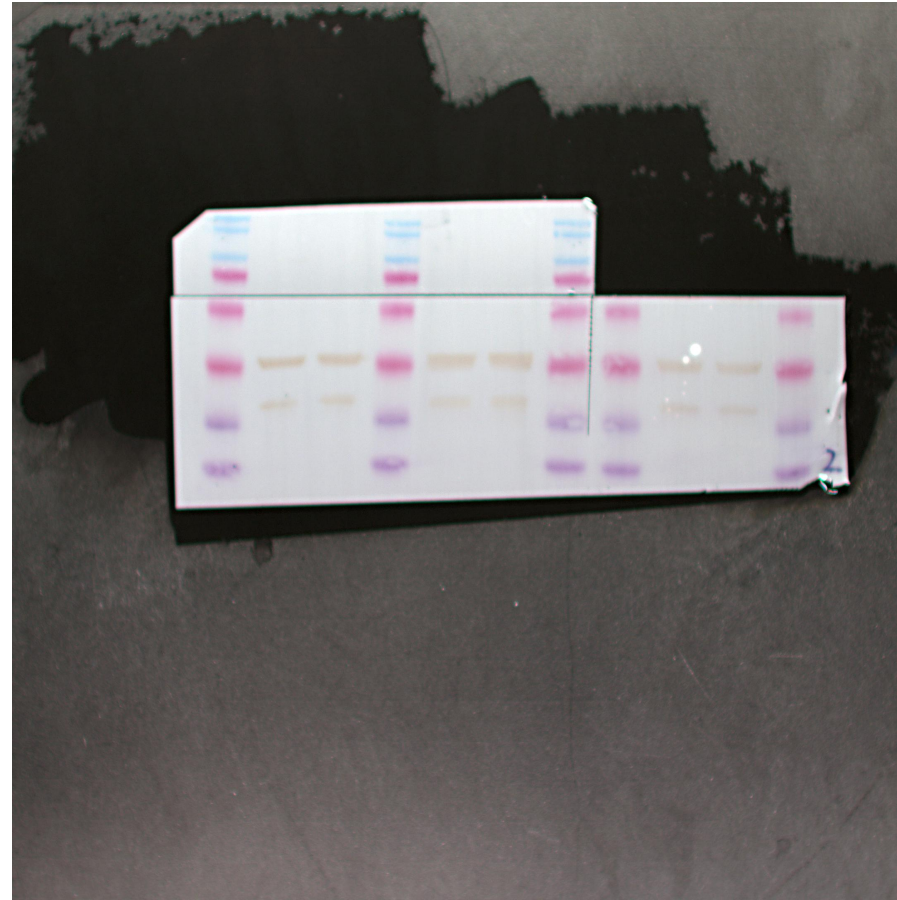

The membrane was cut prior to antibody incubation

- Supplementary\_Figure\_3\_Original\_Blots\_Replicate\_2(n=3)

COG5-flag

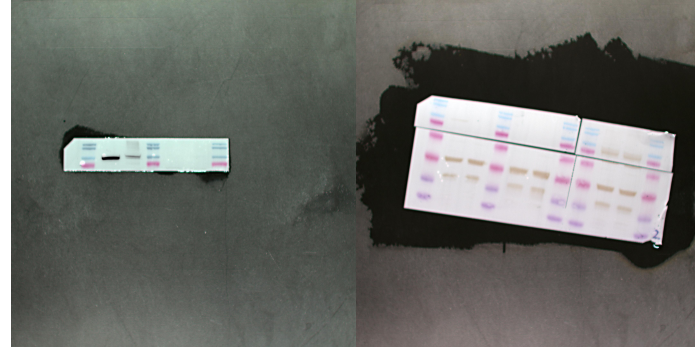

$\beta$ -actin

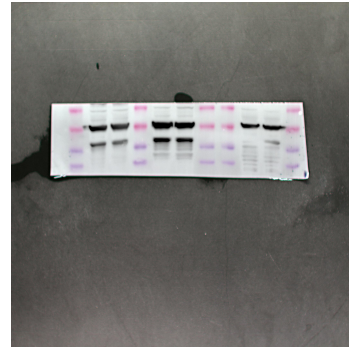

The membrane was cut prior to antibody incubation

- Supplementary\_Figure\_3\_Original\_Blots\_Replicate\_3(n=3)

Selected for Figure 3B

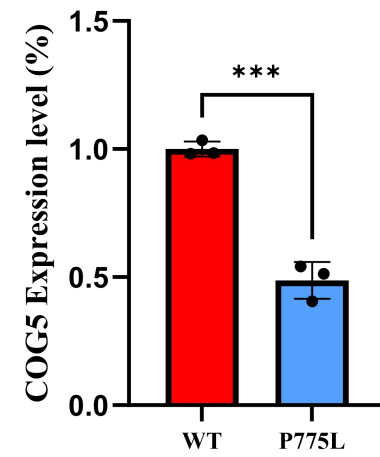

COG5-flag

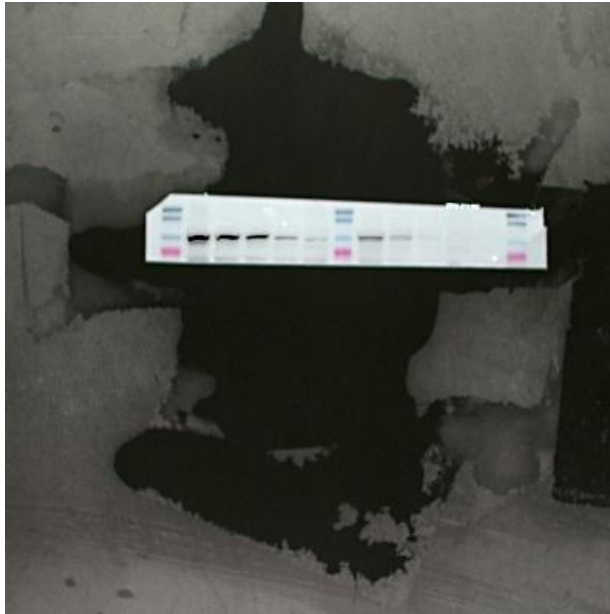

GAPDH

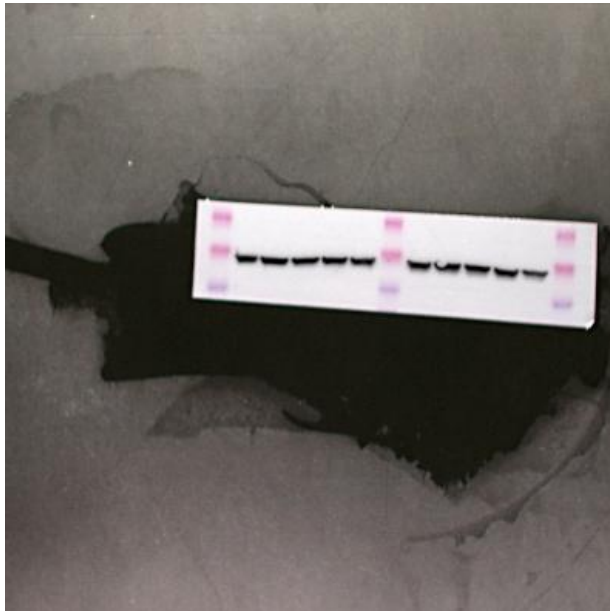

Selected for Figure 4A  
Cropped area used in Figure 4A

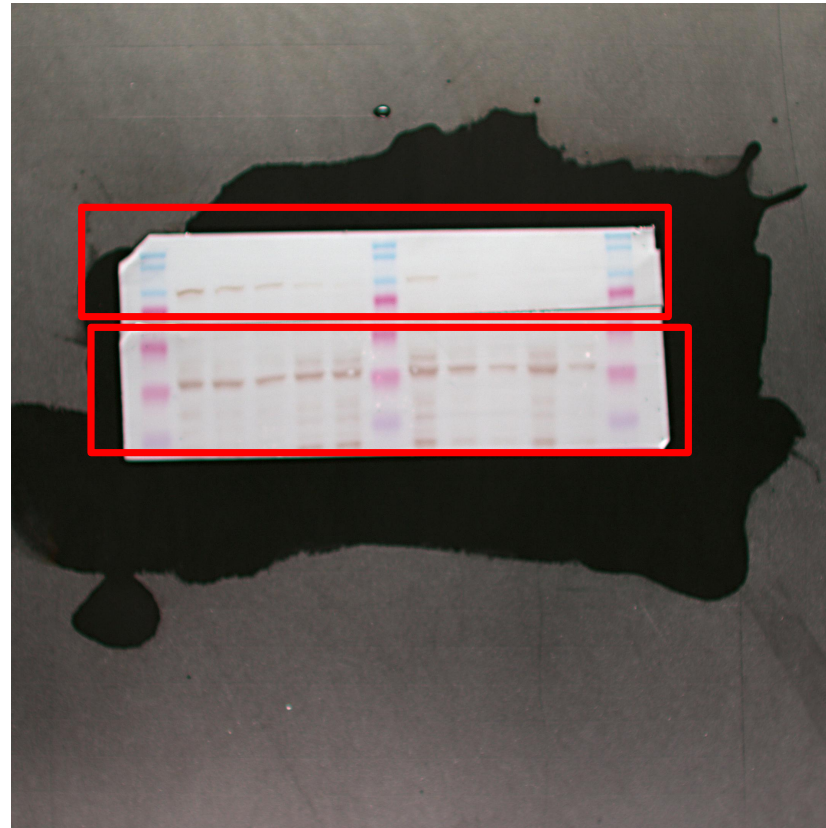

The membrane was cut prior  
to antibody incubation

- Supplementary\_Figure\_4\_Original\_Blots\_Replicate\_1(n=3)

COG5-flag

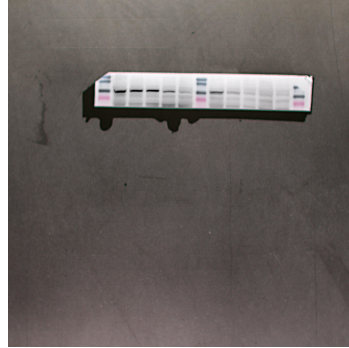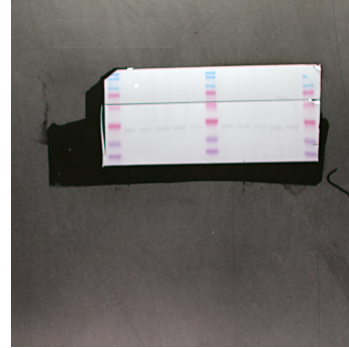

GAPDH

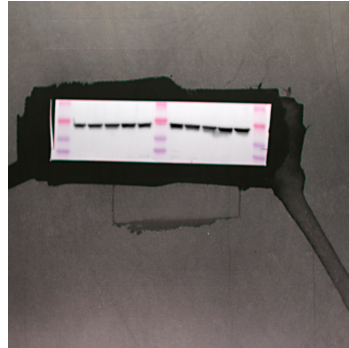

The membrane was cut prior to antibody incubation

- Supplementary\_Figure\_4\_Original\_Blots\_Replicate\_2(n=3)
- Replicate 2 of 3 – not selected (consistent trend)

COG5-flag

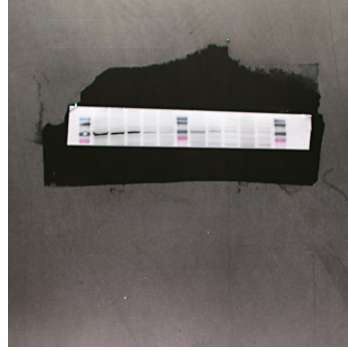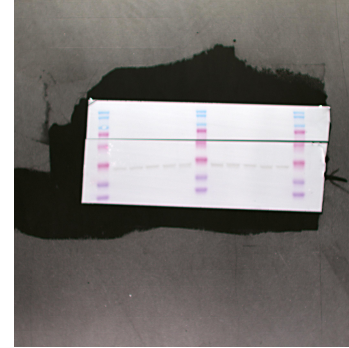

GAPDH

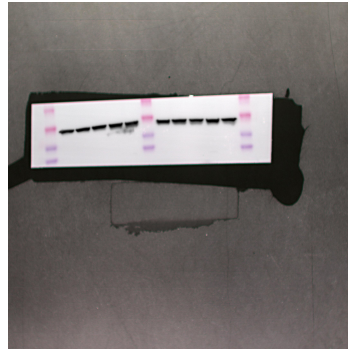

The membrane was cut prior to antibody incubation

- Supplementary\_Figure\_4\_Original\_Blots\_Replicate\_3(n=3)
- Replicate 3 of 3 – not selected (consistent trend)

Selected for Figure 4B

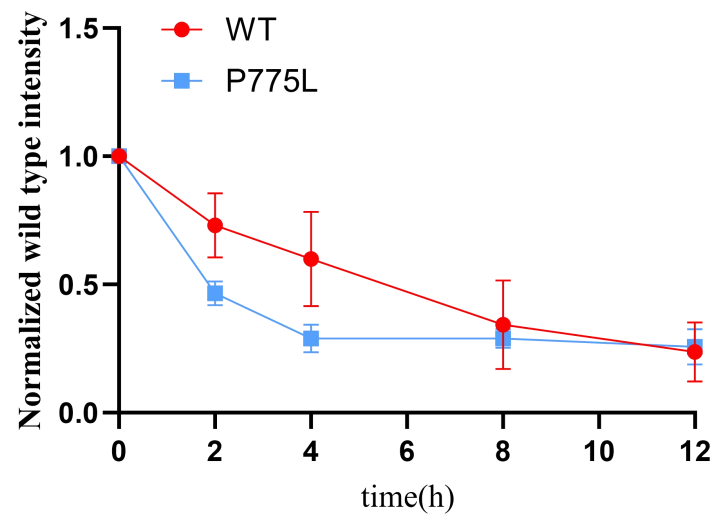

COG5-flag

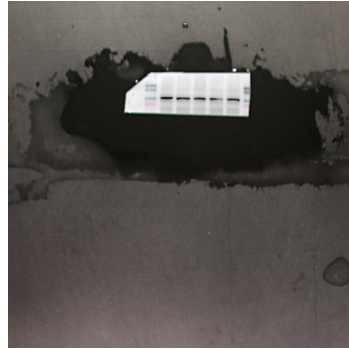

WT

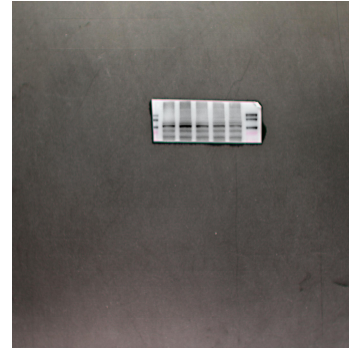

P775L

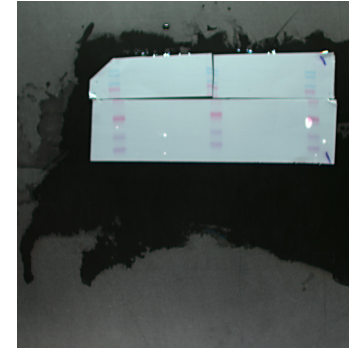

The membrane was cut prior to antibody incubation

GAPDH

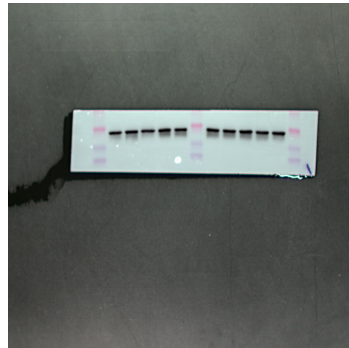

- Supplementary\_Figure\_5\_Original\_Blots\_Replicate\_1(n=3)
- Replicate 1 of 3 – not selected (consistent trend)

COG5-flag

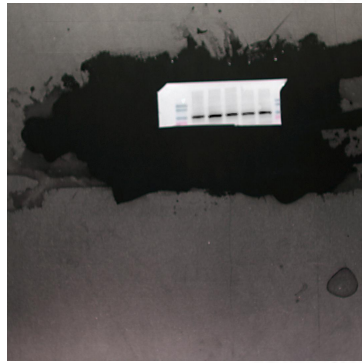

WT

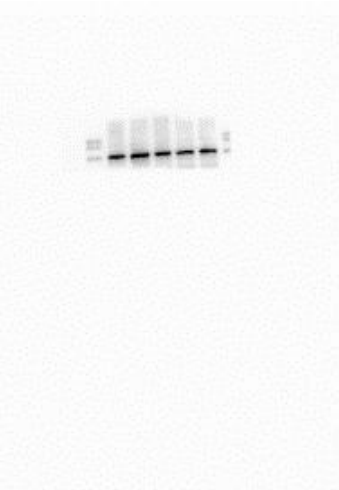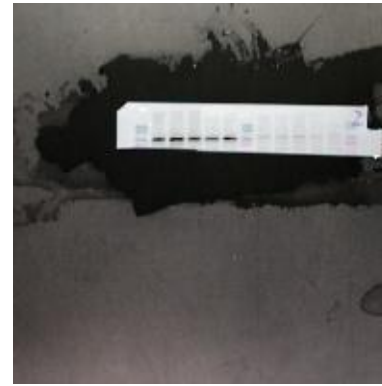

P775L

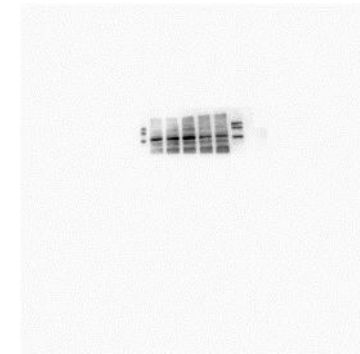

GAPDH

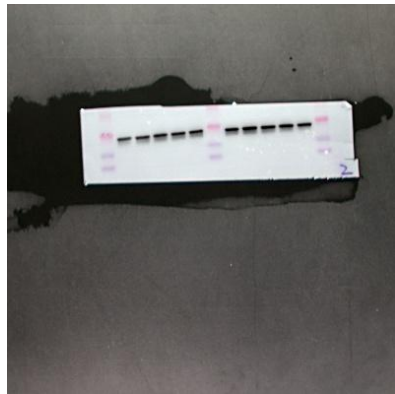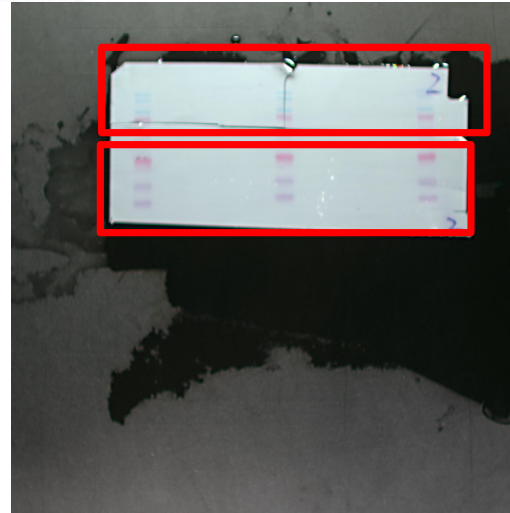

Selected for Figure 5A  
Cropped area used in  
Figure 5A

The membrane was cut prior  
to antibody incubation

- Supplementary\_Figure\_5\_Original\_Blots\_Replicate\_2(n=3)

COG5-flag

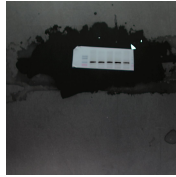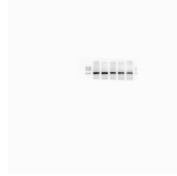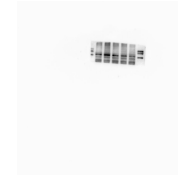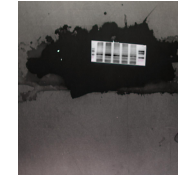

WT

P775L

GAPDH

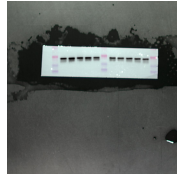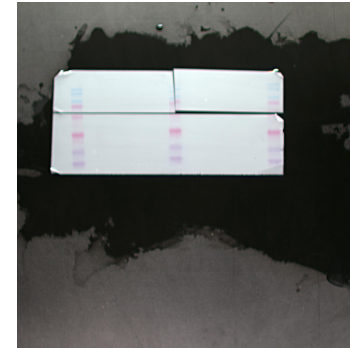

The membrane was cut prior to antibody incubation

- Supplementary\_Figure\_5\_Original\_Blots\_Replicate\_3(n=3)
- Replicate 3 of 3 – not selected (consistent trend)

Selected for Figure 5B

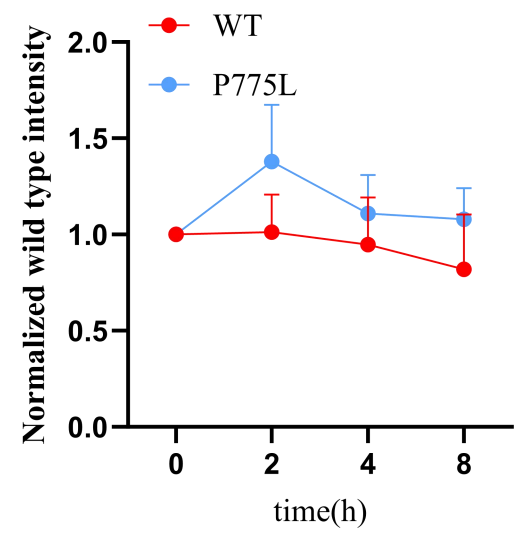

COG5-flag

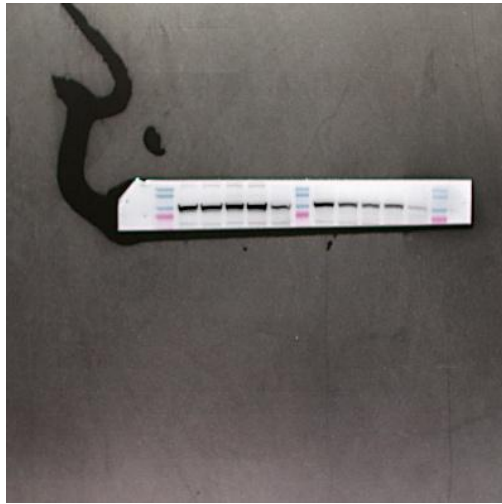

GAPDH

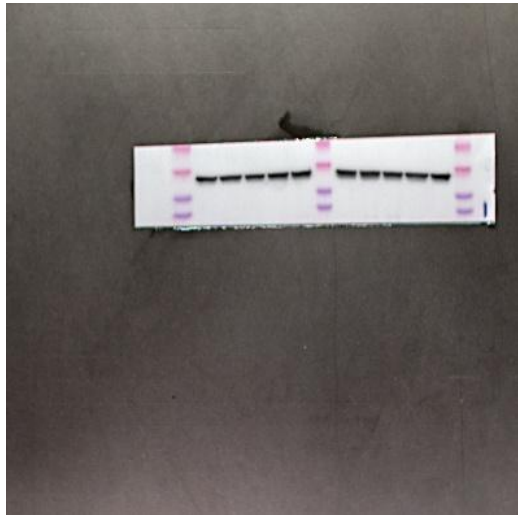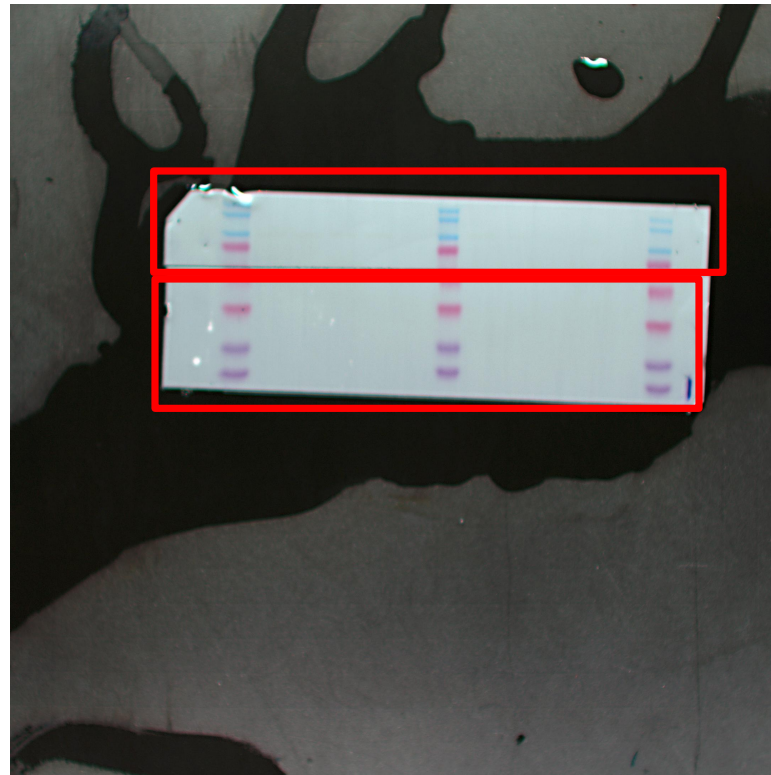

Selected for Figure 6A  
Cropped area used in  
Figure 6A

The membrane was cut prior  
to antibody incubation

- Supplementary\_Figure\_6\_Original\_Blots\_Replicate\_1(n=3)

COG5-flag

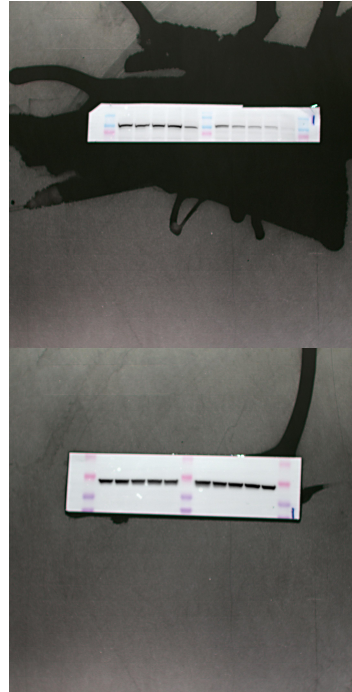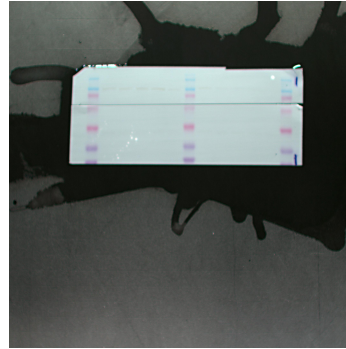

GAPDH

The membrane was cut prior to antibody incubation

- Supplementary\_Figure\_6\_Original\_Blots\_Replicate\_2(n=3)
- Replicate 2 of 3 – not selected (consistent trend)

COG5-flag

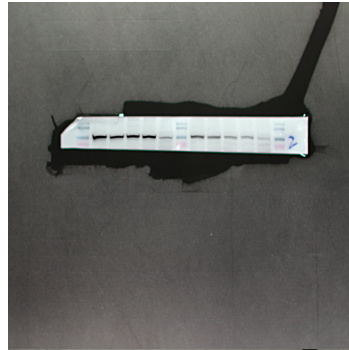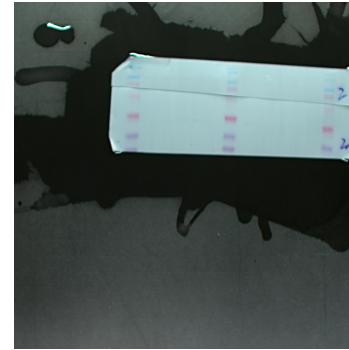

The membrane was cut prior to antibody incubation

GAPDH

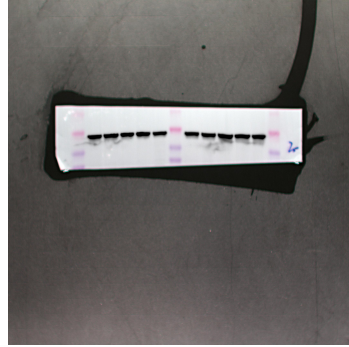

- Supplementary\_Figure\_6\_Original\_Blots\_Replicate\_3(n=3)
- Replicate 3 of 3 – not selected (consistent trend)

Selected for Figure 6B

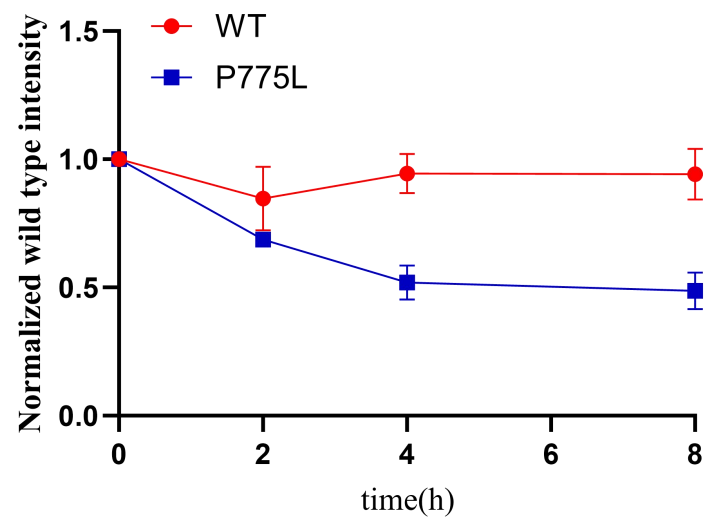

Supplement: Supplementary file 1 [file 74d9ac1c2fd1f73c773c0c06.pdf]
